# Supplementary material for: A highly dispersed and stable Ni/mSiO2-AE nanocatalyst for benzoic acid hydrogenation
Source: Royal Society of Chemistry journal article supplement (doi:10.1039/c7cy02195j), 2017-01-01
Supplement: c7cy02195j1.pdf [file c7cy02195j1.pdf]

## Catalysis Science & Technology

### Electronic Supporting Information

A highly dispersed and stable Ni/mSiO<sub>2</sub>-AE nanocatalyst for  
benzoic acid hydrogenation

Huiling Zhang<sup>a‡</sup>, Xuejia Gao<sup>a‡</sup>, Yuanyuan Ma<sup>a</sup>, Xue Han<sup>a,b</sup>, Libo Niu<sup>a\*</sup>, and Guoyi Bai<sup>a\*</sup>

<sup>a</sup> Key Laboratory of Chemical Biology of Hebei Province, College of Chemistry and  
Environmental Science, Hebei University, Baoding 071002, P.R. China.

E-mail address: baiguoyi@hotmail.com(G. Bai), libo\_niu@126.com (L. Niu);

Fax: +86-312-5937102;Phone: +86-312-5079359;

<sup>b</sup> Hebei Geological and Mineral Central Laboratory, Baoding 071051, People's Republic of China.

<sup>‡</sup> the two authors contribute the same to this work.

## Table of Contents

|                   |    |
|-------------------|----|
| XRD patterns..... | S3 |
| TEM images.....   | S4 |
| Table S1 .....    | S5 |
| Table S2 .....    | S6 |

## XRD patterns

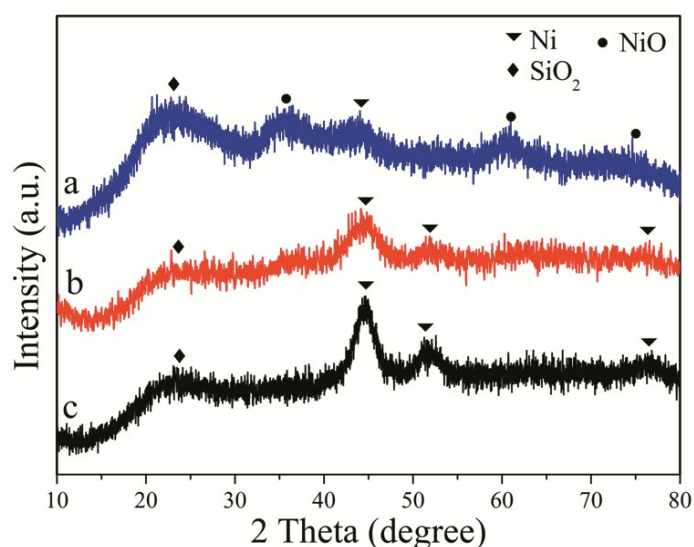

**Fig. S1** XRD patterns of Ni/mSiO<sub>2</sub>-AE reduced at different temperatures.(a. 500 °C, b. 600 °C, c. 700 °C)

XRD patterns of the Ni/mSiO<sub>2</sub>-AE catalyst reduced at different temperatures are shown in Fig. S1. Notably, NiO diffraction peaks at 2θ of 37.3°, 62.9° and 75.4°, together with a broad peak of Ni<sup>0</sup> (at 44.5°), were found in the XRD pattern of the Ni/mSiO<sub>2</sub>-AE catalyst reduced at 500 °C (Fig. R1a), indicating the partially reduction of the NiO species in Ni/mSiO<sub>2</sub>-AE at 500 °C (*Appl. Catal., B: Environ.*, 2013, **132–133**, 282–292, *ACS Catal.*, 2014, **4**, 1526-1536.) However, only Ni<sup>0</sup> diffraction peaks at 2θ of 44.5°, 51.8° and 76.4° are found in the XRD patterns of Ni/mSiO<sub>2</sub>-AE samples reduced at 600 and 700 °C (Fig. R1 b and c) (*J. Catal.*, 2012, **291**, 149–154). In addition, the characteristic diffraction peaks of Ni/mSiO<sub>2</sub>-AE reduced at 700 °C are sharper than those of Ni/mSiO<sub>2</sub>-AE reduced at 600 °C, indicating that larger Ni<sup>0</sup> nanoparticles were formed in higher reduction temperature.

## TEM image

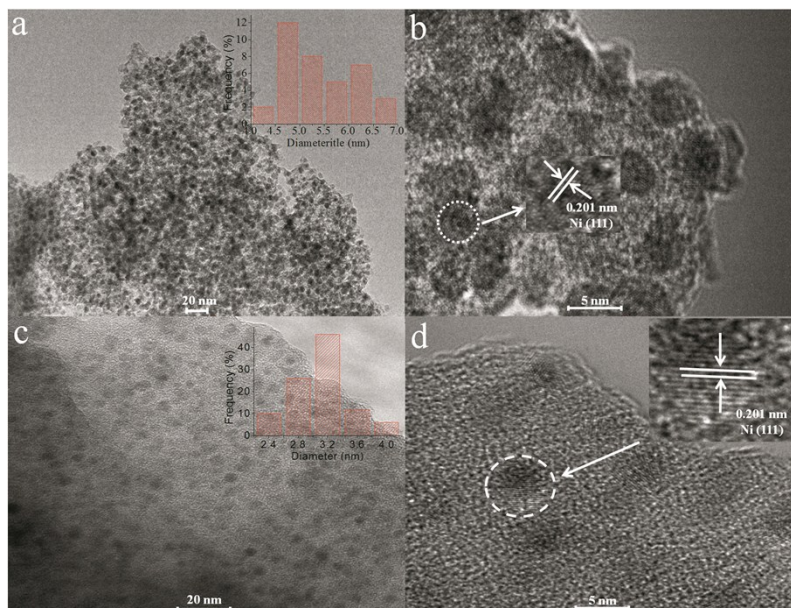

**Fig. S2** TEM images of (a) Ni/mSiO<sub>2</sub>-AE (700 °C), (b) HRTEM of Ni/mSiO<sub>2</sub>-AE (700 °C), (c) Ni/mSiO<sub>2</sub>-AE (600 °C) and (d) HRTEM of Ni/mSiO<sub>2</sub>-AE (600 °C).

TEM images of Ni/mSiO<sub>2</sub>-AE (700 °C) and Ni/mSiO<sub>2</sub>-AE (600 °C) are shown in Fig. S2. As can be seen, the mean size of nickel in Ni/mSiO<sub>2</sub>-AE (700 °C) is about 5.5 nm, which is about 1.7 times larger than that of Ni/mSiO<sub>2</sub>-AE (600 °C) (3.2 nm), in good agreement with the XRD results.

## Table S1

**Table. S1** Activities of catalysts reduced at different temperatures

| Catalysts                        | Conversion (%) | Selectivity (%) |
|----------------------------------|----------------|-----------------|
| Ni/mSiO <sub>2</sub> -AE(500 °C) | 39.4           | 96.8            |
| Ni/mSiO <sub>2</sub> -AE(600 °C) | 98.9           | 99.1            |
| Ni/mSiO <sub>2</sub> -AE(700 °C) | 97.9           | 94.9            |

Reaction conditions: BA (0.5 g), catalyst (0.1 g), cyclohexane (40 mL),

T=150 °C, initial P(H<sub>2</sub>) =5 MPa, reaction time 3 h.

The activities of the Ni/mSiO<sub>2</sub>-AE catalyst reduced at different temperatures indicated that the Ni/mSiO<sub>2</sub>-AE catalyst reduced at 600 °C exhibited similar hydrogenation performance with the catalyst reduced at 700 °C, both much higher than that of the one reduced at 500 °C. Considering the energy economy, 600 °C is selected as an appropriate reduction temperature for Ni/mSiO<sub>2</sub>-AE.

**Table S2****Table S2** TOF values of Ni/mSiO<sub>2</sub>-AE and reported noble metal catalysts

| Catalysts                                                 | Conversion (%)    | TOF (h <sup>-1</sup> ) |
|-----------------------------------------------------------|-------------------|------------------------|
| Ir/ $\gamma$ -Al <sub>2</sub> O <sub>3</sub> <sup>7</sup> | 52                | 40                     |
| Pd/AC <sup>8</sup>                                        | 92.0              | 5.7                    |
| Pd/CN <sup>9</sup>                                        | 100               | 0.883                  |
| Pd <sub>x</sub> Ru <sub>y</sub> <sup>10</sup>             | 45                | ----                   |
| Rh/C <sup>11</sup>                                        | 95.8              | ----                   |
| Ru <sub>10</sub> Pt <sub>2</sub> <sup>12</sup>            | 78.5              | 317                    |
| RuPd/CN <sup>13</sup>                                     | 100               | 2066                   |
| Ni/mSiO <sub>2</sub> -AE                                  | 98.9 <sup>a</sup> | 137.4 <sup>b</sup>     |

<sup>a</sup> Reaction conditions: BA (0.5 g), catalyst (0.1 g), cyclohexane (40 mL), T=150 °C, initial P(H<sub>2</sub>)=5 MPa, reaction time 3 h;

<sup>b</sup> TOF value were calculated on the basis of the number of moles of benzoic acid converted per mole of active metal per hour, according to the literature (*Ind. Eng. Chem. Res.*, 2013, **52**, 1224).

---- There was no TOF value in this article.

Superscript 7-13 refer to the serial number of the references in the manuscript.

As can be seen, Ni/mSiO<sub>2</sub>-AE showed good catalytic activities with a TOF value of 134.7 h<sup>-1</sup>, much higher than those of Ir/ $\gamma$ -Al<sub>2</sub>O<sub>3</sub><sup>7</sup> (40 h<sup>-1</sup>), Pd/AC<sup>8</sup> (5.7 h<sup>-1</sup>), Pd/CN<sup>9</sup> (0.883 h<sup>-1</sup>), but lower than Ru<sub>10</sub>Pt<sub>2</sub><sup>12</sup> (317 h<sup>-1</sup>) and RuPd/CN<sup>13</sup> (2066 h<sup>-1</sup>). The above results indicated that the Ni/mSiO<sub>2</sub>-AE has a comparable activity with most of noble metal catalysts.
